# Supplementary material for: Antimicrobial peptide-modified silver nanoparticles for enhancing the antibacterial efficacy
Source: Royal Society of Chemistry journal article supplement (doi:10.1039/d0ra05640e), 2020-01-01
Supplement: d0ra05640e1.pdf [file d0ra05640e1.pdf]

## Supporting information

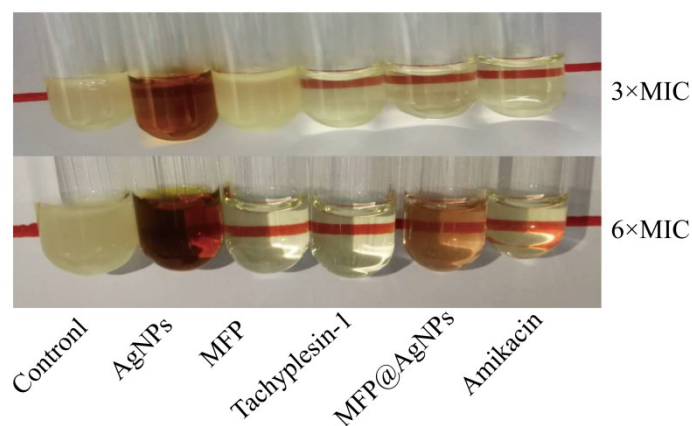

Figure S1. Representative images of antibacterial activity against MDR-AB at different concentrations (3xMIC and 6xMIC).

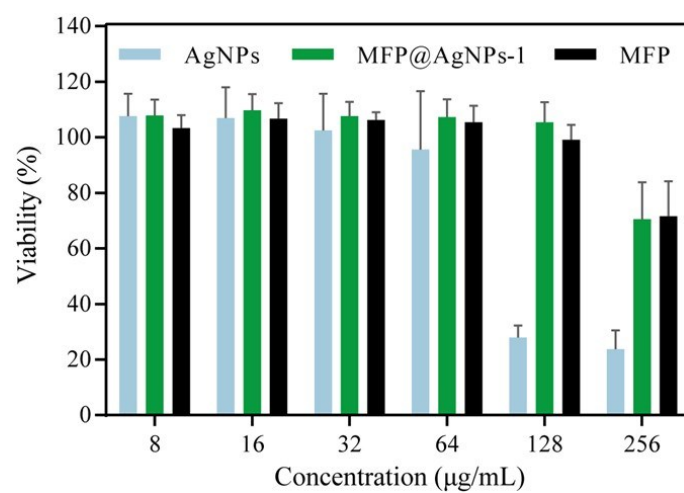

Figure S2. Cytotoxicity against HUVEC.

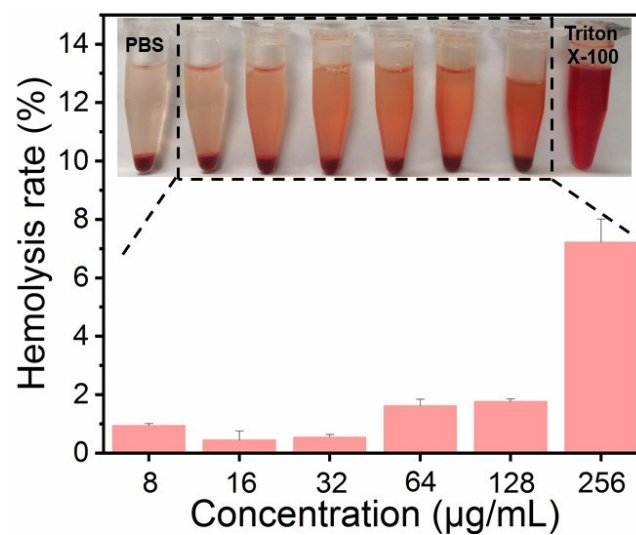

Figure S3. Images of hemolysis assay and the hemolysis rate of MFP@AgNPs-1 at various concentrations.

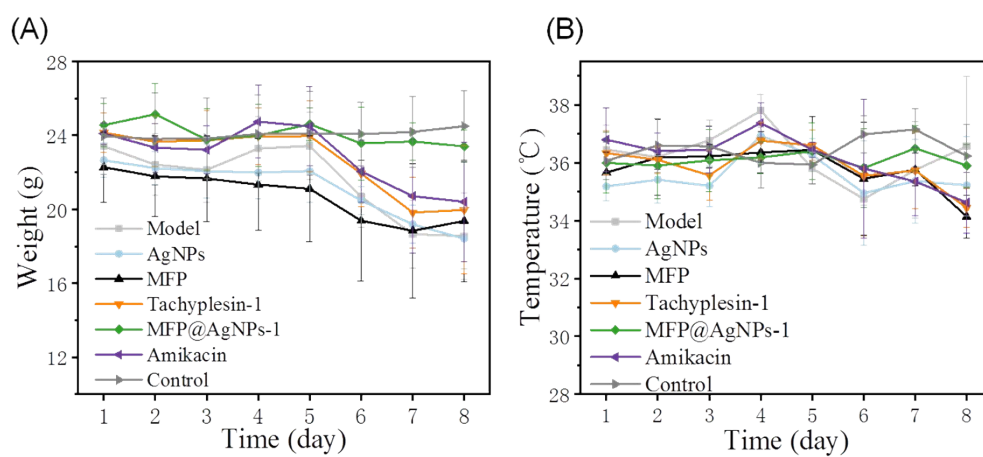

Figure S4. Monitor of (A) weight and (B) temperature overtime.

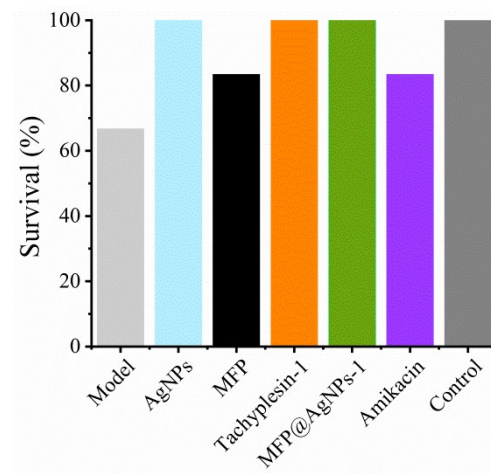

Figure S5. Survival assay of MDR-AB infected mice after treatment.
